# Supplementary material
Source: publisher figshare collection journal article supplement (https://acs.figshare.com/ndownloader/files/22003767)
Supplement: Supplementary file 1 [file 22003767]

**Supporting information**

**Optimized Al Doping Improves both Interphase Stability and Bulk**

**Structural Integrity of Ni-Rich NMC Cathode Materials**

Wengao Zhao<sup>1,#</sup>, Lianfeng Zou<sup>2, #</sup>, Haiping Jia<sup>1</sup>, Jianming Zheng<sup>\*1</sup>, Donghao Wang<sup>3</sup>, Junhua Song<sup>1</sup>, Chaoyu Hong<sup>4</sup>, Rui Liu<sup>4</sup>, Wu Xu<sup>1</sup>, Yong Yang<sup>3,4</sup>, Jie Xiao<sup>1</sup>, Chongmin Wang<sup>\*2</sup>, Jiguang Zhang<sup>\*1</sup>

<sup>1</sup> Energy and Environment Directorate, Pacific Northwest National Laboratory, Richland, Washington 99354, USA

<sup>2</sup> Environmental Molecular Sciences Laboratory, Pacific Northwest National Laboratory, Richland, Washington 99354, USA

<sup>3</sup> School of Energy Research, Xiamen University, Xiamen, Fujian 361005, China

<sup>4</sup> State Key Lab of Physical Chemistry of Solid Surfaces, and Department of Chemistry, College of Chemistry and Chemical Engineering, Xiamen University, Xiamen, Fujian 361005, China

<sup>#</sup> W. Z. and L. Z. contributed equally to this work.

<sup>\*</sup> Corresponding authors. E-mails: [jiguang.zhang@pnnl.gov](mailto:jiguang.zhang@pnnl.gov); [chongmin.wang@pnnl.gov](mailto:chongmin.wang@pnnl.gov); [ZhengJM@ATLBattery.com](mailto:ZhengJM@ATLBattery.com)

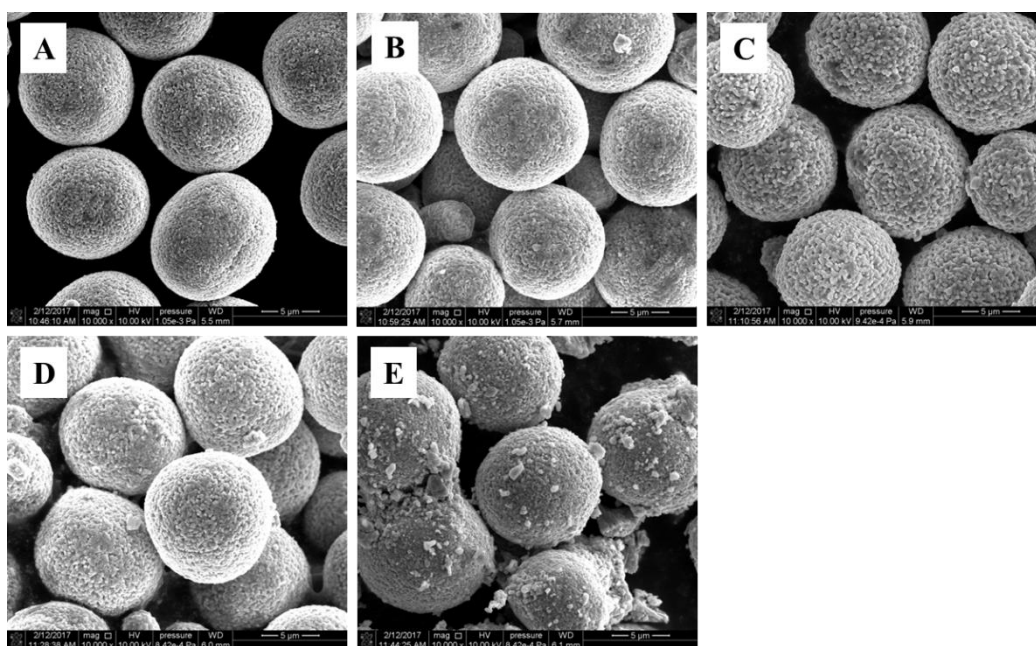

**Figure S1.** SEM images of pristine NMC76 and Al-doped NMC76 with different Al contents: (A) pristine; (B) 0.5% Al-NMC76; (C) 1% Al-NMC76; (D) 2% Al-NMC76; (E) 5% Al-NMC76.

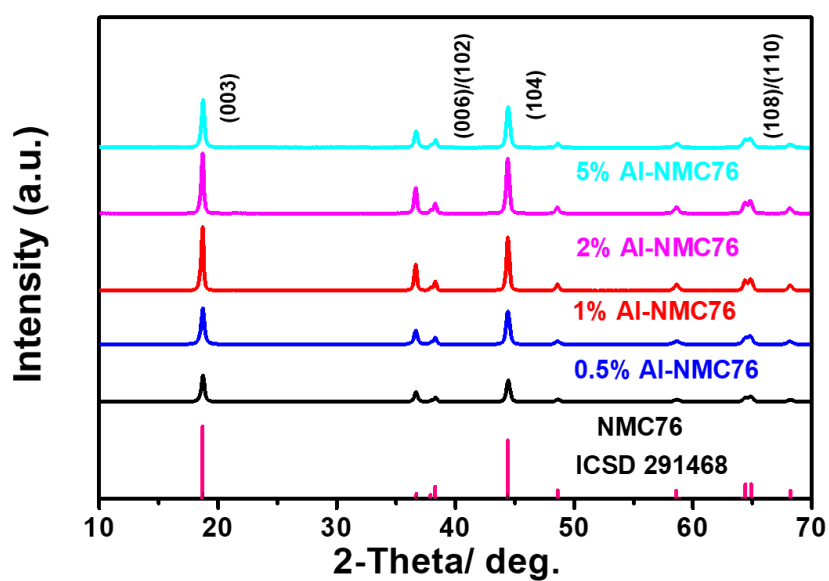

**Figure S2.** XRD patterns of pristine NMC76 and NMC76 doped with various Al contents.

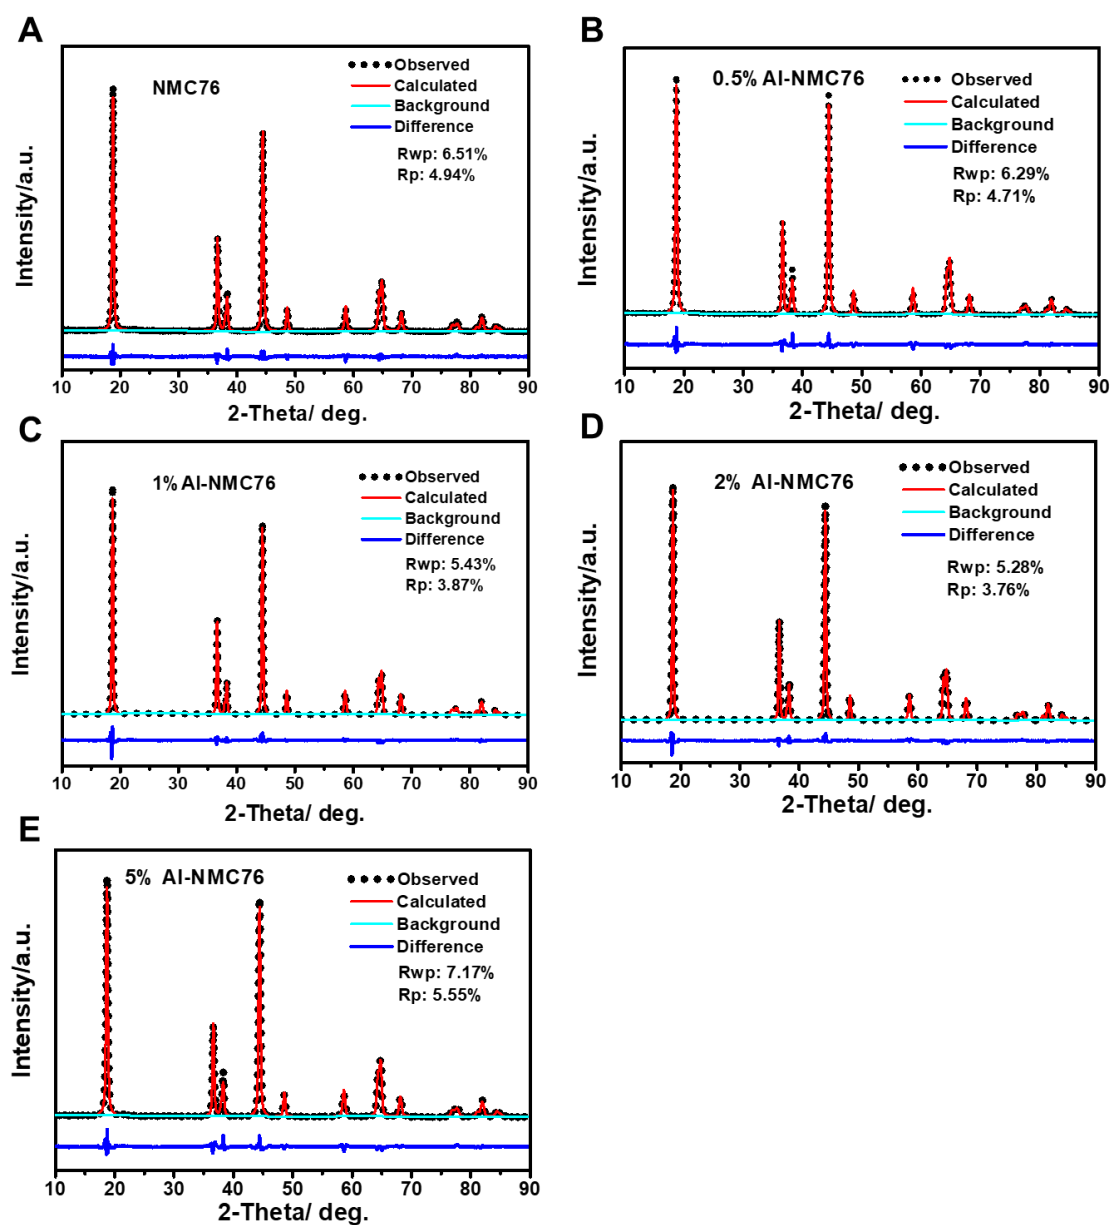

**Figure S3.** Rietveld refinement results of XRD patterns for NMC76 (A) and Al-doped NMC76 with different Al content, (B) 0.5%Al-NMC76, (C) 1%Al-NMC76, (D)2%Al-NMC76, and (E) 5%Al-NMC76.

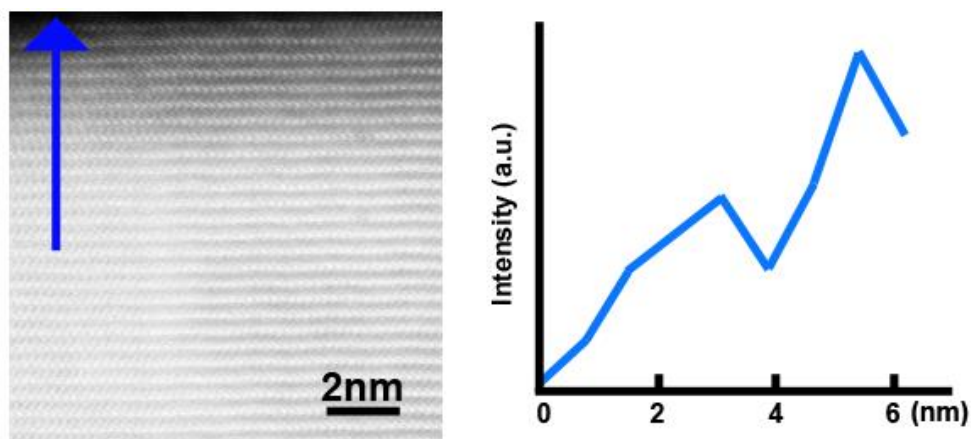

**Figure S4.** STEM line scanning of the 1%Al-NMC76.

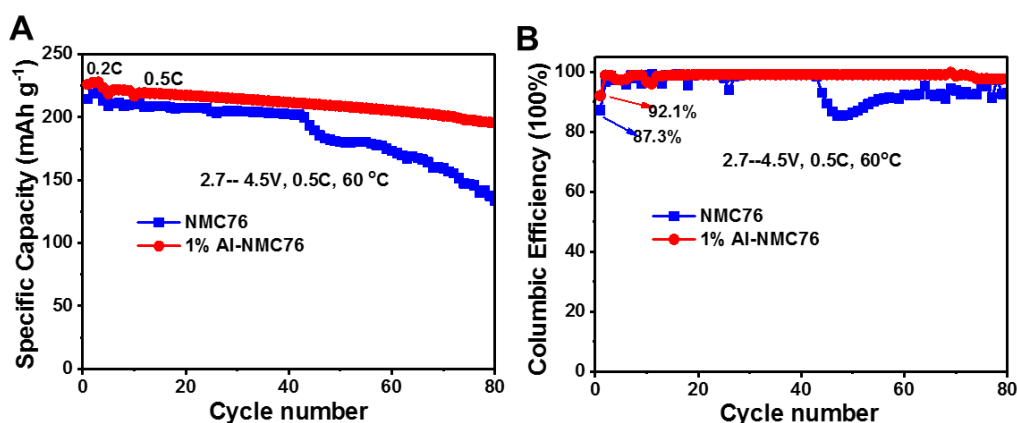

**Figure S5.** High temperature (60°C) cycling performance (A) and CE (B) of NMC76 and 1%Al-NMC in Li half-cells at a current density of 0.5C.

**Table S1.** Electrochemical performance comparison between our sample and other Al-doped Ni-rich NMC cathodes.

| NMC cathode                                                                      | Electrolyte                                           | Voltage (V) | Capacity retention                         | References |
|----------------------------------------------------------------------------------|-------------------------------------------------------|-------------|--------------------------------------------|------------|
| $\text{LiNi}_{0.8}\text{Co}_{0.1}\text{Mn}_{0.09}\text{Al}_{0.01}\text{O}_2$     | 1.0M $\text{LiPF}_6$ in EC: DMC = 1:1 v%              | 2.7-4.3V    | 78.9% (1C, 200 cycles)                     | 34         |
| $\text{LiNi}_{0.48}\text{Co}_{0.2}\text{Mn}_{0.3}\text{Al}_{0.02}\text{O}_2$     | 1.0M $\text{LiPF}_6$ in LEC: DMC: EMC (1:1:1 v%)      | 3.0-4.6V    | 82.1% (0.5C, 200 cycles)                   | 35         |
| $\text{Li}[\text{Ni}_{0.865}\text{Co}_{0.120}\text{Al}_{0.015}]\text{O}_2$       | 1.2M $\text{LiPF}_6$ in EC: EMC (3: 7 v%) + 2 wt% VC  | 2.7-4.3     | 91.6% (0.5C, 100 cycles)                   | 25         |
| $\text{LiNi}_{0.88}\text{Co}_{0.095}\text{Mn}_{0.025}\text{Al}_{0.02}\text{O}_2$ | 1.2M $\text{LiPF}_6$ in EC: EMC (3:7v% ) + 2 wt% VC   | 2.8-4.3V    | 91.5% (1C, 150 cycles)                     | 36         |
| $\text{LiNi}_{0.92}\text{Co}_{0.06}\text{Al}_{0.02}\text{O}_2$                   | 1.2M $\text{LiPF}_6$ in EC: EMC (3: 7 v%) + 2 vol% VC | 2.8-4.4V    | 86% (1C, 300 cycles)                       | 11         |
| 1%Al-NMC76                                                                       | 1.0M $\text{LiPF}_6$ in EC: EMC = 4: 6 v%             | 2.7-4.5V    | 87.7% (0.33C, 250)<br>79.2% (0.2C/5C, 500) | This work  |

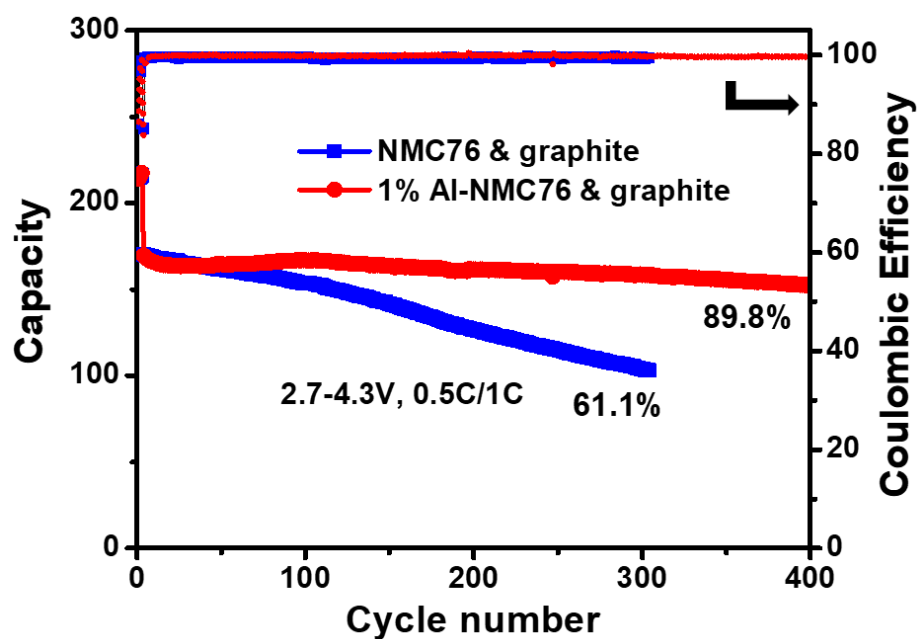

**Figure S6.** Comparison of long-term cycling performance of NMC76 and 1% Al-NMC76 cathodes with graphite anodes in coin-type full cells between 2.7 and 4.3 V at 0.5C/1C.

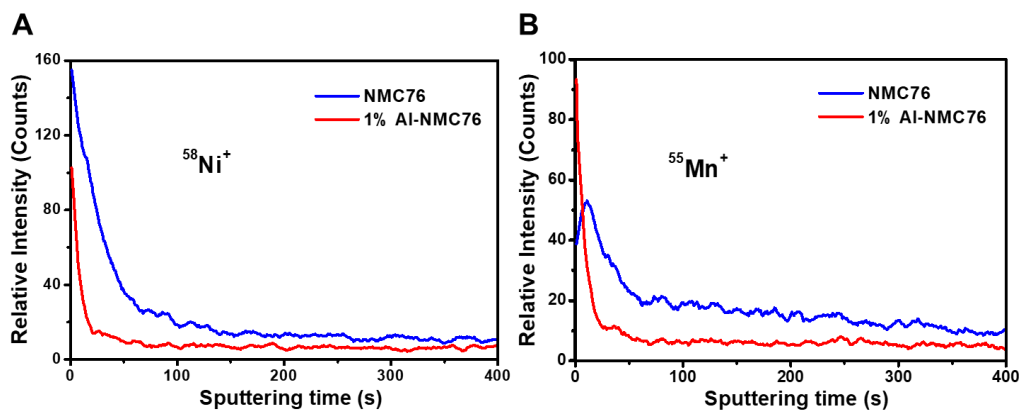

**Figure S7.** TOF-SIMS depth profiles (normalized with cycled graphite in 1%Al-NMC76 based cell) of secondary ions fragments on the cycled graphite: (A)  $^{58}\text{Ni}^+$ ; (B)  $^{55}\text{Mn}^+$ . The cycled graphite anodes were harvested from coin-type full cells composed NMC76 and 1% Al-NMC76 with graphite anode after 400 cycles at 0.5C/1C charge/discharge in the voltage of 2.5-4.3V.

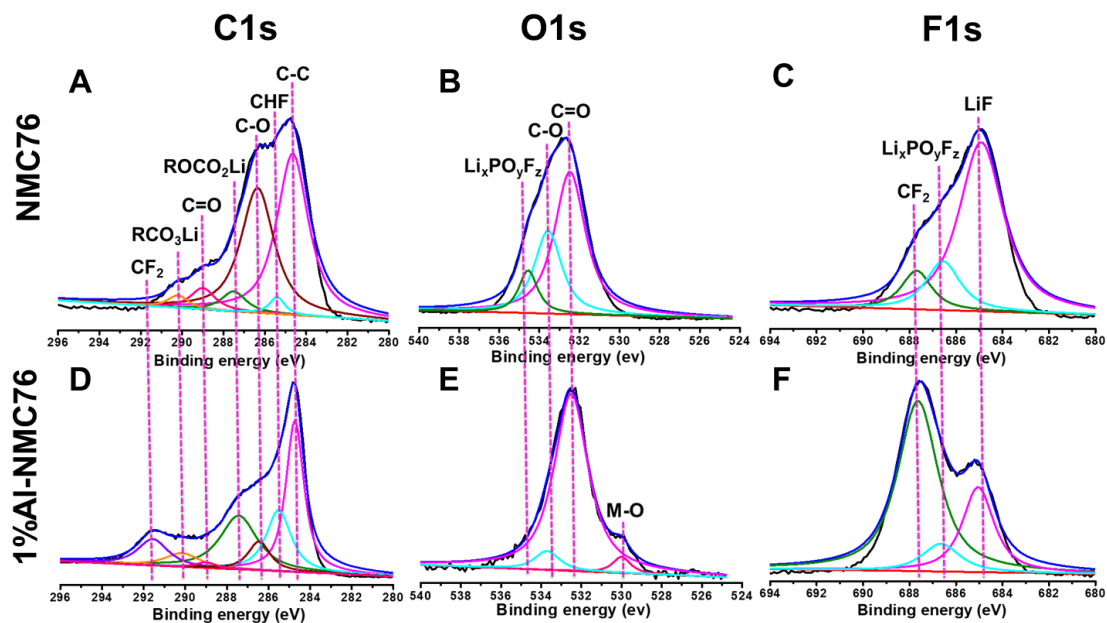

**Figure S8.** XPS characterization of cycled 1%Al-NMC after 500 cycles. Top row: (A) C1s, (B) O1s, and (C) F1s of cycled NMC76; Bottom row: (D) C1s, (E) O1s, and (D) F1s of cycled 1%Al-NMC76.

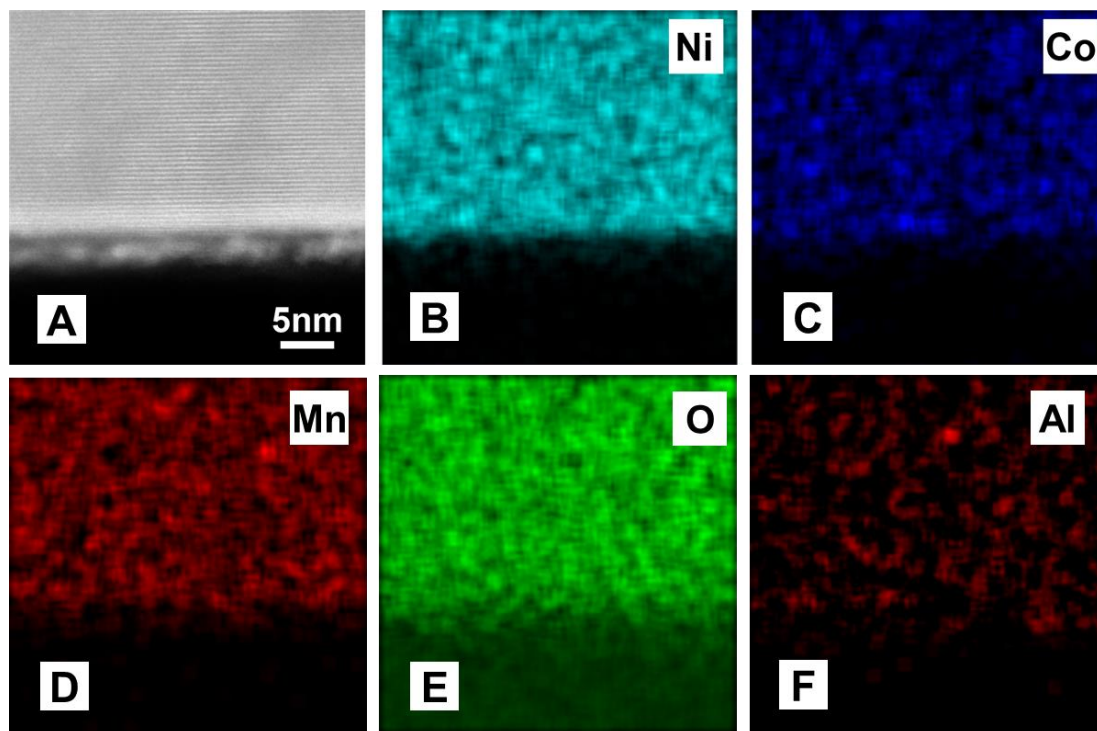

**Figure S9.** HAADF-EDS mapping of 1%Al-NMC76 after 500 cycles. (A) HAADF-STEM image. Corresponding EDS maps of Ni (B), Co (C), Mn (D), O (E), and Al (F).
